# Supplementary material for: Influence of Cover Crop Termination on Ground Dwelling Arthropods in Organic Vegetable Systems
Source: PubMed Central journal article supplement (PMC7412336; doi:10.3390/insects11070445), 2020-07-15
Supplement: insects-11-00445-s001.pdf [file insects-11-00445-s001.pdf]

**Supplementary material Table S1.** Compositions and seeding rates of the cover crops.

| <b>Cauliflower</b>                                                                         |
|--------------------------------------------------------------------------------------------|
| 100% <i>Vigna unguiculata</i>                                                              |
| 70% <i>Vigna unguiculata</i> + 30% <i>Pennisetum glaucum</i>                               |
| 50% <i>Vigna unguiculata</i> + 50% <i>Pennisetum glaucum</i>                               |
| 40% <i>Vigna unguiculata</i> + 30% <i>Pennisetum glaucum</i> + 30% <i>Raphanus sativus</i> |
| <b>Seeding rates</b>                                                                       |
| <i>Vigna unguiculata</i> 50 kg ha <sup>-1</sup>                                            |
| <i>Pennisetum glaucum</i> 60 kg ha <sup>-1</sup>                                           |
| <i>Raphanus sativus</i> 50 kg ha <sup>-1</sup>                                             |
| <b>Tomato</b>                                                                              |
| 20% <i>Hordeum vulgare</i> + 80% <i>Vicia sativa</i>                                       |
| 20% <i>Hordeum vulgare</i> + 80% <i>Vicia faba</i> Pers.                                   |
| <b>Seeding rates</b>                                                                       |
| <i>Hordeum vulgare</i> 40 kg ha <sup>-1</sup>                                              |
| <i>Vicia sativa</i> 65 kg ha <sup>-1</sup>                                                 |
| <i>Vicia faba</i> 120 kg ha <sup>-1</sup>                                                  |

**Supplementary material Table S2.** List of ground beetle species sampled by pitfall traps. GM = green manure, RC = roller crimper.

| Species                                             | Cauliflower |     |      |     |       | Tomato |    |      |    |       |
|-----------------------------------------------------|-------------|-----|------|-----|-------|--------|----|------|----|-------|
|                                                     | 2015        |     | 2016 |     | Total | 2016   |    | 2017 |    | Total |
|                                                     | RC          | GM  | RC   | GM  |       | RC     | GM | RC   | GM |       |
| <i>Acinopus megacephalus</i> (Rossi)                |             |     |      |     |       | 1      |    |      |    | 1     |
| <i>Agonum</i> sp.                                   |             |     | 3    | 1   | 4     |        |    |      |    |       |
| <i>Amblystomus</i> sp.                              |             |     | 1    | 2   | 3     |        |    |      |    |       |
| <i>Anchomenus dorsalis</i> (Pontoppidan)            | 18          | 16  | 29   | 29  | 92    | 37     | 7  |      |    | 44    |
| <i>Philochthus lunulatus</i> (Fourcroy)             |             |     |      |     |       | 1      |    |      |    | 1     |
| <i>Brachinus crepitans</i> (L.)                     | 144         | 59  | 66   | 91  | 360   | 34     | 3  |      | 1  | 38    |
| <i>Brachinus elegans</i> Chaudoir                   |             | 1   |      |     | 1     |        |    |      |    | 0     |
| <i>Brachinus immaculicornis</i> Dejean              | 16          | 10  | 24   | 29  | 79    | 165    | 37 |      | 3  | 205   |
| <i>Brachinus italicus</i> Dejean                    | 1           | 2   | 9    | 10  | 22    | 2      |    |      |    | 2     |
| <i>Brachinus psophia</i> Audinet-Serville           |             |     |      | 3   | 3     | 2      |    | 1    |    | 3     |
| <i>Calathus cinctus</i> Motschulsky                 | 86          | 62  | 31   | 71  | 250   | 1      |    |      |    | 1     |
| <i>Calathus circumseptus</i> Germar                 | 9           | 2   | 3    | 2   | 16    | 2      |    |      |    | 2     |
| <i>Calathus fuscipes</i> (Goeze)                    | 1           |     | 3    | 2   | 6     |        |    |      |    |       |
| <i>Campalita maderae</i> (Fabricius)                | 1           |     |      |     | 1     |        |    |      |    |       |
| <i>Carabus coriaceus</i> L.                         | 11          | 6   | 35   | 24  | 76    |        |    |      |    |       |
| <i>Carterus fulvipes</i> (Latreille)                |             |     |      |     |       |        |    | 2    |    | 2     |
| <i>Chlaenius chrysocephalus</i> (Rossi)             | 2           |     |      |     | 2     |        |    |      |    |       |
| <i>Chlaenius festivus</i> (Panzer)                  |             |     |      |     |       | 4      |    |      |    | 4     |
| <i>Demetrias atricapillus</i> (L.)                  |             |     |      |     |       | 5      |    |      |    | 5     |
| <i>Dicheirotichus chloroticus</i> (Dejean)          | 11          | 21  | 34   | 64  | 130   | 0      |    |      |    |       |
| <i>Dinodes decipiens</i> (Dufour)                   | 1           |     | 4    | 4   | 9     | 15     | 1  | 6    | 12 | 34    |
| <i>Distichus planus</i> (Bonelli)                   | 4           | 1   | 5    | 2   | 12    | 11     | 39 | 59   | 52 | 161   |
| <i>Harpalophonus italicus</i> (Schaum)              |             |     | 1    |     | 1     |        |    |      |    |       |
| <i>Harpalus distinguendus</i> (Duftschmid)          | 24          | 8   | 2    | 5   | 39    |        |    |      |    | 1     |
| <i>Harpalus oblitus</i> Dejean                      |             |     |      |     |       |        |    |      |    |       |
| <i>Laemostenus acutangulus</i> (Schaufuss)          | 1           |     |      |     | 1     |        |    |      |    |       |
| <i>Lebia humeralis</i> Dejean                       | 4           | 4   |      | 1   | 9     | 1      |    | 3    | 4  | 8     |
| <i>Leistus fulvibarbis</i> Dejean                   | 2           | 2   | 1    |     | 5     |        |    |      |    |       |
| <i>Licinus silphoides</i> (Rossi)                   |             |     | 7    | 3   | 10    |        |    |      |    |       |
| <i>Microlestes corticalis</i> (Dufour)              | 3           | 7   |      |     | 10    | 2      |    |      |    | 2     |
| <i>Microlestes fulvibasis</i> (Reitter)             |             |     |      |     |       |        |    | 5    | 3  | 8     |
| <i>Microlestes</i> cfr. <i>fissuralis</i> (Reitter) |             |     |      |     |       | 1      |    |      |    | 1     |
| <i>Nebria brevicollis</i> Motschulsky               | 2           | 2   |      | 3   | 7     |        |    |      |    |       |
| <i>Notiophilus geminatus</i> Dejean                 | 4           |     |      |     | 4     |        |    |      |    |       |
| <i>Paratachys micros</i> (Fischer)                  |             | 1   |      |     | 1     |        |    |      |    |       |
| <i>Parophonus hispanus</i> (Rambur)                 |             |     |      |     |       |        | 1  |      |    | 1     |
| <i>Pedius inquinatus</i> (Sturm)                    |             |     | 4    | 1   | 5     | 2      | 1  | 1    |    | 4     |
| <i>Poecilus cupreus</i> (Linnaeus)                  |             |     | 20   | 16  | 36    | 120    | 38 |      |    | 158   |
| <i>Poecilus cursorius</i> (Dejean)                  |             | 1   |      | 1   | 2     | 24     | 20 |      | 1  | 45    |
| <i>Poecilus nitidus</i> (Dejean)                    | 9           | 18  | 1    |     | 28    | 18     | 16 |      |    | 34    |
| <i>Poecilus versicolor</i> (Sturm)                  | 12          | 10  |      |     | 22    |        |    |      |    |       |
| <i>Polyderis algiricus</i> (Lucas)                  | 1           |     |      |     | 1     |        |    |      |    |       |
| <i>Pseudophonus griseus</i> (Panzer)                | 24          | 6   | 4    | 1   | 35    |        |    |      |    |       |
| <i>Pseudophonus rufipes</i> (Degeer)                | 685         | 123 | 124  | 133 | 1065  | 27     | 8  | 13   | 17 | 65    |
| <i>Pterostichus macer</i> (Marsham)                 | 27          | 25  | 90   | 146 | 288   | 3      | 2  |      |    | 5     |

**Supplementary material Table S2.** List of ground beetle species sampled by pitfall traps. GM = green manure, RC = roller crimper. (continued)

| Species                                      | Cauliflower |            |            |            |             | Tomato     |            |            |           |            |
|----------------------------------------------|-------------|------------|------------|------------|-------------|------------|------------|------------|-----------|------------|
|                                              | 2015        |            | 2016       |            | Total       | 2016       |            | 2017       |           | Total      |
|                                              | RC          | GM         | RC         | GM         |             | RC         | GM         | RC         | GM        |            |
| <i>Pterostichus melas</i> (Creutzer)         | 139         | 81         | 137        | 145        | 502         | 7          | 2          | 1          | 1         | 11         |
| <i>Scybalicus oblongiusculus</i> (Dejean)    | 48          | 60         | 85         | 130        | 323         | 4          | 6          | 15         | 4         | 29         |
| <i>Siagona europaea</i> Dejean               | 1           | 4          | 4          | 1          | 10          | 1          | 3          | 1          | 1         | 6          |
| <i>Stenolophus teutonus</i> (Schrank)        |             |            |            |            |             | 1          | 2          |            |           | 3          |
| <i>Syntomus obscuroguttatus</i> (Duftschmid) |             |            |            |            |             | 2          |            |            |           | 2          |
| <i>Trechus quadristriatus</i> (Schrank)      | 12          | 1          | 2          | 3          | 18          | 4          | 1          |            |           | 5          |
| <i>Zabrus tenebrioides</i> (Goeze)           |             |            |            | 1          | 1           |            |            |            |           |            |
| <b>Total</b>                                 | <b>1303</b> | <b>533</b> | <b>729</b> | <b>924</b> | <b>3489</b> | <b>497</b> | <b>187</b> | <b>108</b> | <b>99</b> | <b>891</b> |

**Supplementary material Table S3.** List of rove beetle species sampled by pitfall traps. GM = green manure, RC = roller crimper.

| Species                                    | Cauliflower |     |      |     |       | Tomato |    |      |    |       |
|--------------------------------------------|-------------|-----|------|-----|-------|--------|----|------|----|-------|
|                                            | 2015        |     | 2016 |     | Total | 2016   |    | 2017 |    | Total |
|                                            | RC          | GM  | RC   | GM  |       | RC     | GM | RC   | GM |       |
| Aleocharinae                               | 51          | 78  | 43   | 40  | 212   | 12     | 50 | 5    | 14 | 81    |
| <i>Anotylus</i> sp.1                       | 29          | 112 | 21   | 66  | 228   |        |    |      |    |       |
| <i>Anotylus</i> sp.2                       | 2           | 6   |      |     | 8     |        |    | 2    | 1  | 3     |
| <i>Anotylus</i> sp.3                       |             |     |      | 1   | 1     |        |    |      |    |       |
| <i>Astenus bimaculatus</i> (Erichson)      | 2           | 1   | 2    | 1   | 6     | 1      | 2  |      |    | 3     |
| <i>Astenus lyonessius</i> (Joy)            | 1           | 3   |      | 1   | 5     | 2      | 2  |      |    | 4     |
| <i>Astrapaeus ulmi</i> (Rossi)             |             | 1   |      |     | 1     | 1      | 2  |      |    | 3     |
| <i>Bisnius sordidus</i> (Gravenhorst)      |             | 1   |      |     | 1     |        |    |      |    |       |
| <i>Bisnius</i> sp.1                        |             |     |      |     |       |        |    |      | 1  | 1     |
| <i>Bisnius/Rabigus</i> sp.1?               | 3           | 4   |      |     | 7     |        |    |      |    |       |
| <i>Carpelimus corticinus</i> (Gravenhorst) | 12          | 8   | 6    | 2   | 28    | 3      | 9  |      |    | 12    |
| <i>Cordalia obscura</i> (Gravenhorst)      |             |     |      |     |       |        |    |      | 1  | 1     |
| damaged specimens                          | 1           |     | 3    | 5   | 9     |        |    |      |    |       |
| <i>Domene</i> sp.                          |             | 1   |      |     | 1     |        |    |      |    |       |
| <i>Gabrius</i> sp.                         |             |     |      |     |       |        |    |      |    | 1     |
| <i>Ischnosoma splendidum</i> (Gravenhorst) |             |     | 2    |     | 2     |        |    |      |    |       |
| <i>Leptacinus intermedius</i> Donisthorpe  | 2           | 2   |      | 1   | 5     | 1      | 2  |      | 1  | 4     |
| <i>Leptobium gracile</i> (Gravenhorst)     | 1           |     |      | 2   | 3     |        | 2  |      |    | 2     |
| <i>Lobrathium</i> sp.                      |             |     |      |     |       |        |    | 1    |    | 1     |
| <i>Luzea nigrifulva</i> (Erichson)         | 2           | 5   |      | 2   | 9     |        | 1  |      |    | 1     |
| <i>Megalinus glabratus</i> (Gravenhorst)   |             | 1   |      | 1   | 2     | 1      |    |      |    | 1     |
| <i>Mycetoporus</i> sp.                     |             |     | 8    | 4   | 12    | 2      | 2  |      |    | 4     |
| <i>Ocypus nitens</i> (Schrank)             | 1           |     | 9    | 11  | 21    |        | 1  |      |    | 1     |
| <i>Ocypus olens</i> (O. Muller)            | 10          | 75  | 6    | 38  | 129   |        |    |      |    |       |
| <i>Othius volans</i> J. Sahlberg           |             | 1   |      |     | 1     |        |    |      |    |       |
| <i>Philonthus cognatus</i> Stephens        |             |     |      |     |       | 2      | 1  |      |    | 3     |
| <i>Philonthus concinnus</i> (Gravenhorst)  |             | 3   |      | 2   | 5     | 8      | 5  |      |    | 13    |
| <i>Platystethus nitens</i> (C. Sahlberg)   | 1           | 8   | 1    | 2   | 12    | 3      | 5  |      |    | 8     |
| <i>Platystethus</i> sp.                    | 0           | 2   |      |     | 2     |        |    |      |    |       |
| Pselaphinae sp.1                           |             |     |      |     |       |        | 2  |      |    | 2     |
| Pselaphinae sp.2                           | 1           |     |      |     | 1     |        |    |      |    |       |
| Pselaphinae sp.3                           | 1           |     |      |     | 1     |        |    |      |    |       |
| <i>Pseudolathra lusitanica</i> (Erichson)  |             |     |      |     |       | 1      |    |      |    | 1     |
| <i>Quedius levicollis</i> (Brullé)         |             | 4   |      |     | 4     |        |    |      |    |       |
| <i>Quedius picipes</i> (Mannerheim)        |             | 1   | 1    | 1   | 3     |        |    |      |    |       |
| <i>Quedius simplicifrons</i> Fairmaire     | 41          | 186 | 129  | 222 | 578   |        |    |      |    |       |
| <i>Rugilus orbiculatus</i> (Paykull)       | 1           | 1   |      | 7   | 9     | 3      | 11 |      |    | 14    |
| <i>Scopaeus debilis</i> Hochhuth           | 4           | 1   |      |     | 5     |        |    |      |    |       |
| Scydmaenidae                               |             |     |      |     |       |        |    | 1    | 1  | 2     |
| Staphylinidae sp.                          |             |     |      |     |       | 2      |    |      |    | 2     |
| <i>Stenus trivialis</i> Kraatz             | 5           | 17  | 1    | 3   | 26    | 2      | 6  |      |    | 8     |
| <i>Tachyporus hypnorum</i> (Fabricius)     | 1           |     |      |     | 1     |        | 12 |      |    | 12    |
| <i>Tachyporus nitidulus</i> (Fabricius)    | 1           | 4   |      |     | 5     | 3      | 3  |      |    | 6     |
| <i>Tachyporus</i> sp.1                     |             |     |      | 2   | 2     |        |    |      |    |       |
| <i>Tachyporus</i> sp.2                     | 1           |     |      |     | 1     |        |    |      |    |       |

**Supplementary material Table S3.** List of rove beetle species sampled by pitfall traps. GM = green manure, RC = roller crimper. (continued)

| Species                                | Cauliflower |            |            |            |             | Tomato    |            |           |           |            |
|----------------------------------------|-------------|------------|------------|------------|-------------|-----------|------------|-----------|-----------|------------|
|                                        | 2015        |            | 2016       |            |             | 2016      |            | 2017      |           |            |
|                                        | RC          | GM         | RC         | GM         | Total       | RC        | GM         | RC        | GM        | Total      |
| <i>Tasgius falcifer</i> (Nordmann)     | 3           | 6          | 9          | 10         | 28          |           |            | 2         | 1         | 3          |
| <i>Tasgius globulifer</i> (Geoffroy)   |             | 10         |            |            | 10          |           |            |           |           |            |
| <i>Tasgius pedator</i> (Gravenhorst)   | 3           | 1          | 23         | 15         | 42          |           | 1          |           |           | 1          |
| <i>Tasgius winkleri</i> (Bernhauer)    | 8           | 3          | 13         | 21         | 45          |           |            |           |           |            |
| <i>Xantholinus appenninicola</i> Steel |             |            | 1          | 5          | 6           |           |            |           |           |            |
| <b>Total</b>                           | <b>188</b>  | <b>546</b> | <b>278</b> | <b>465</b> | <b>1477</b> | <b>47</b> | <b>120</b> | <b>11</b> | <b>20</b> | <b>198</b> |

**Supplementary material Table S4.** List of spider families sampled by pitfall traps. GM = green manure, RC = roller crimper.

| Family           | Cauliflower |            |            |            |             | Tomato     |             |            |            |             |
|------------------|-------------|------------|------------|------------|-------------|------------|-------------|------------|------------|-------------|
|                  | 2015        |            | 2016       |            | Total       | 2016       |             | 2017       |            | Total       |
|                  | RC          | GM         | RC         | GM         |             | RC         | GM          | RC         | GM         |             |
| Agelenidae       |             |            |            |            |             | 1          | 1           |            |            | 2           |
| Cheiracanthiidae | 1           |            |            |            | 1           |            |             | 2          |            | 2           |
| Cybaeidae        |             | 1          |            |            | 1           |            |             |            |            |             |
| Dysderidae       | 12          | 9          | 30         | 30         | 81          | 5          | 7           | 5          | 9          | 26          |
| Gnaphosidae      | 79          | 42         | 27         | 27         | 175         | 27         | 46          | 78         | 40         | 191         |
| Linyphiidae      | 10          | 17         | 19         | 25         | 71          | 104        | 18          | 45         | 23         | 190         |
| Liocranidae      | 1           | 2          | 1          |            | 4           |            | 5           | 4          | 1          | 10          |
| Lycosidae        | 193         | 282        | 321        | 250        | 1046        | 442        | 1119        | 311        | 659        | 2531        |
| Mimetidae        |             |            |            |            |             | 1          | 1           |            |            | 2           |
| Nemesidae        |             |            | 1          | 4          | 5           |            |             | 1          | 1          | 2           |
| Oecibiidae       |             |            |            |            |             |            |             |            | 1          | 1           |
| Philodromidae    |             |            |            |            |             |            |             | 2          | 1          | 3           |
| Pholcidae        |             |            |            |            |             |            |             | 1          |            | 1           |
| Phrurolithidae   |             | 3          | 1          | 5          | 9           | 1          | 2           | 1          | 1          | 5           |
| Salticidae       | 3           | 5          | 1          | 4          | 13          | 4          | 1           | 4          | 4          | 13          |
| Tetragnathidae   |             |            |            |            |             | 1          |             |            |            | 1           |
| Theridiidae      | 1           |            |            | 1          | 2           |            |             | 10         | 4          | 14          |
| Thomisidae       | 17          | 10         |            |            | 27          |            |             |            |            |             |
| Titanoecidae     |             |            | 5          | 3          | 8           | 5          | 4           | 3          | 3          | 15          |
| Trachelidae      | 1           | 2          |            | 1          | 4           |            |             |            | 1          | 1           |
| Zodariidae       | 1           |            | 1          |            | 2           |            |             | 5          | 4          | 9           |
| <b>Total</b>     | <b>319</b>  | <b>373</b> | <b>407</b> | <b>350</b> | <b>1449</b> | <b>591</b> | <b>1204</b> | <b>472</b> | <b>752</b> | <b>3019</b> |
